# Supplementary material for: Mechanisms of Trichomes and Terpene Compounds in Indigenous and Commercial Thai Rice Varieties against Brown Planthopper
Source: MDPI journal article supplement (doi:10.3390/insects13050427), 2022-05-01
Supplement: s1 [file s1]

Supplementary Table S1. Volatile profiles from rice test of Terpene and Derivatives and Relative Abundance (%) by constitutive and inducible release methods.

| Rice varieties | Compounds                                                         | % Relative Abundance |                 |
|----------------|-------------------------------------------------------------------|----------------------|-----------------|
|                |                                                                   | Constitutive defense | Induced defense |
| RH             | Cyclobutane, 1,3-diisopropenyl-, trans                            | 2.098                | 6.958           |
|                | 1,5-Heptadiene, 3-methyl-, (E)-                                   | 0.063                | -               |
|                | 4'-Ethylpropiophenone                                             | 0.17                 | -               |
|                | Ethanone, 1-(4-ethylphenyl)-                                      | 0.606                | -               |
|                | $\alpha$ -Cubebene                                                | 3.366                | -               |
|                | Naphthalene, 1,2,3,4,4a,7-hexahydro-1,6dimethyl-1)4 methylethyl)- | 3.366                | -               |
|                | 1-Octene, 2-methyl-                                               | 0.079                | -               |
|                | 1-Hepten-3-one                                                    | 0.463                | -               |
|                | 4-Undecene, 6-methyl-                                             | 0.463                | -               |
|                | Decane, 3,8-dimethyl-                                             | 0.319                | -               |
|                | Tridecane, 2,2,4,10,12,12-hexamethyl-7-(3,5,5-trimethylhexyl)-    | 0.319                | -               |
|                | Cyclopropane, 1-(2-methylbutyl)-1-(1-methylpropyl)-               | 7.86                 | -               |
|                | $\beta$ -Curcumene                                                | 1.404                | -               |
|                | Hexane, 3-methyl-4-methylene-                                     | 0.377                | -               |
|                | 3-Undecene, 5-methyl-                                             | 0.217                | -               |
|                | 3-Ethyl-3-hexene                                                  | 0.107                | -               |
|                | 5-Hepten-3-one, 5-ethyl-4-methyl-                                 | 0.102                | -               |
|                | cis-Muurola-4(15),5-diene                                         | -                    | 2.671           |
|                | $\beta$ -Sesquiphellandrene                                       | -                    | 6.758           |
| Suphan Buri 1  | $\alpha$ -Phellandrene                                            | 0.067                | -               |
|                | D-Limonene                                                        | 11.616               | -               |
|                | Naphthalene                                                       | 10.386               | 2.046           |
|                | $\alpha$ -Cubebene                                                | 7.027                | -               |

| Rice varieties |      | Compounds                                                           | % Relative Abundance |                 |
|----------------|------|---------------------------------------------------------------------|----------------------|-----------------|
|                |      |                                                                     | Constitutive defense | Induced defense |
| Hawm Doo       | Dawk | 5-Hepten-3-one, 5-ethyl-4-methyl-                                   | 0.159                | -               |
|                |      | Hexane, 3,4-bis(1,1-dimethylethyl)-2,2,5,5-tetramethyl-             | 0.15                 | -               |
|                |      | Benzene, (2,2-dimethylpropyl)-                                      | 2.155                | -               |
|                |      | Benzene, [(cyclohex-1-en-1-yl)methyl]-                              | 1.873                | -               |
| Gled Chawn     | Plah | Cyclobutane, 1,3-diisopropenyl-, trans                              | 9.659                | 18.95           |
|                |      | Naphthalene                                                         | 6.04                 | 6.062           |
|                |      | 3-Pentanone, 2,2,4,4-tetramethyl-                                   | 0.23                 | -               |
|                |      | Hexane, 3,4-bis(1,1-dimethylethyl)-2,2,5,5-tetramethyl-             | 0.07                 | -               |
|                |      | Naphthalene, 1,2,3,4,4a,7-hexahydro-1,6-dimethyl-4-(1-methylethyl)- | 3.855                | -               |
|                |      | Bicyclo[5.2.0]nonane, 2-methylene-4,8,8-trimethyl-4-vinyl-          | 4.219                | -               |
|                |      | 1,3,4,6-Hexanetetrone, 1-(4-methylphenyl)-6-phenyl-                 | 0.291                | -               |
|                |      | 1,3-Cyclohexadiene, 5,6-dimethyl-                                   | 0.101                | -               |
|                |      | 1-Methyl-3-(1'-methylcyclopropyl)cyclopentane                       | 0.297                | -               |
|                |      | Santolina triene                                                    | 0.853                | -               |
|                |      | $\beta$ -Myrcene                                                    | 1.658                | 0.171           |
|                |      | Cyclohexene, 1-(1-propynyl)-                                        | 0.14                 | -               |
|                |      | Caryophyllene                                                       | -                    | 27.66           |
|                |      | Geijerene                                                           | -                    | 1.686           |
| Sahm Ruang     |      | Benzene, 1,2-diethyl-                                               | 36.204               | -               |
|                |      | Benzene, 1,4-diethyl-                                               | 37.083               | -               |
|                |      | Cyclopentanone, 2,2,5-trimethyl-                                    | 0.074                | -               |

| Rice varieties | Compounds                                                                          | % Relative Abundance |                 |
|----------------|------------------------------------------------------------------------------------|----------------------|-----------------|
|                |                                                                                    | Constitutive defense | Induced defense |
|                | $\alpha$ -Cubebene                                                                 | -                    | 7.005           |
|                | 2,5-Cyclohexadien-1-one, 4,4'-(1,2-ethanediylidene)bis[2,6-bis(1,1-dimethylethyl)- | -                    | 0.024           |
|                | Cyclobutanone, 2,3,3,4-tetramethyl-                                                | -                    | 0.892           |
| Kam Pai        | Cyclobutane, 1,3-diisopropenyl-, trans                                             | 60.606               | -               |
|                | Tridecane, 2,2,4,10,12,12-hexamethyl-7-(3,5,5-trimethylhexyl)-                     | 1.376                | -               |
|                | Octadecane, 2,2,4,15,17,17-hexamethyl-7,12-bis(3,5,5-trimethylhexyl)-              | 1.368                | -               |
|                | Hexane, 3,4-bis(1,1-dimethylethyl)-2,2,5,5-tetramethyl-                            | 0.029                | -               |
|                | 1,5-Heptadiene, (Z)-                                                               | 0.862                | -               |
|                | Aromandendrene                                                                     | 3.614                | -               |
| Khao Maew      | Cyclobutane, 1,3-diisopropenyl-, trans                                             | 12.799               | 5.207           |
|                | Benzene, 1,4-diethyl-                                                              | 0.107                | 34.845          |
|                | Naphthalene                                                                        | 0.032                | 5.536           |
|                | Caryophyllene                                                                      | 12.567               | -               |
|                | 4'-Ethylpropiophenone                                                              | -                    | 0.443           |
|                | (S,1Z,6Z)-8-Isopropyl-1-methyl-5-methylenecyclodeca-1,6-diene                      |                      | 3.072           |
| KDML105        | Cyclobutane, 1,3-diisopropenyl-, trans                                             | 12.216               | -               |
|                | Naphthalene                                                                        | 0.039                | 1.638           |
|                | cis-Muurola-4(15),5-diene                                                          | 5.596                | -               |
| TN1            | 1,3-Bis(cyclopentyl)-1-cyclopentanone                                              | 0.066                | -               |
|                | Bicyclo[3.1.0]hex-2-ene, 4-methyl-1-(1-methylethyl)-                               | 0.055                | -               |
|                | $\alpha$ -Phellandrene                                                             | 0.847                | -               |

| Rice varieties | Compounds                                                            | % Relative Abundance |                 |
|----------------|----------------------------------------------------------------------|----------------------|-----------------|
|                |                                                                      | Constitutive defense | Induced defense |
|                | Cyclobutane, 1,2-bis(1-methylethenyl)-, trans-                       | 10.351               | -               |
|                | Hexane, 3,4-bis(1,1-dimethylethyl)-2,2,5,5-tetramethyl               | 0.162                | -               |
|                | Naphthalene                                                          | 10.087               | 6.154           |
|                | 1H-Indene, 1-hexadecyl-2,3-dihydro-                                  | 0.125                | -               |
|                | $\beta$ -Caryophyllen                                                | 23.253               | -               |
|                | 1,5-Heptadiene, (E)-                                                 | -                    | 0.057           |
|                | Ethanone, 1-(4-ethylphenyl)-                                         | -                    | 2.179           |
|                | 1-Penten-3-one                                                       | -                    | 0.079           |
| Beu Sim        | Cyclobutane, 1,3-diisopropenyl-, trans                               | 12.799               | -               |
|                | 4-(2', 4', 4'-trimethyl-yciclo[4.1.0]hept-2'-en-3'-yl)-3-buten-2-one | 12.567               | -               |
|                | Cyclobutane, 1,2-dipropenyl-                                         | -                    | 8.811           |
|                | Benzene, 1,3-diethyl                                                 | -                    | 30.096          |
|                | Benzene, 1,4-diethyl-                                                | -                    | 30.751          |

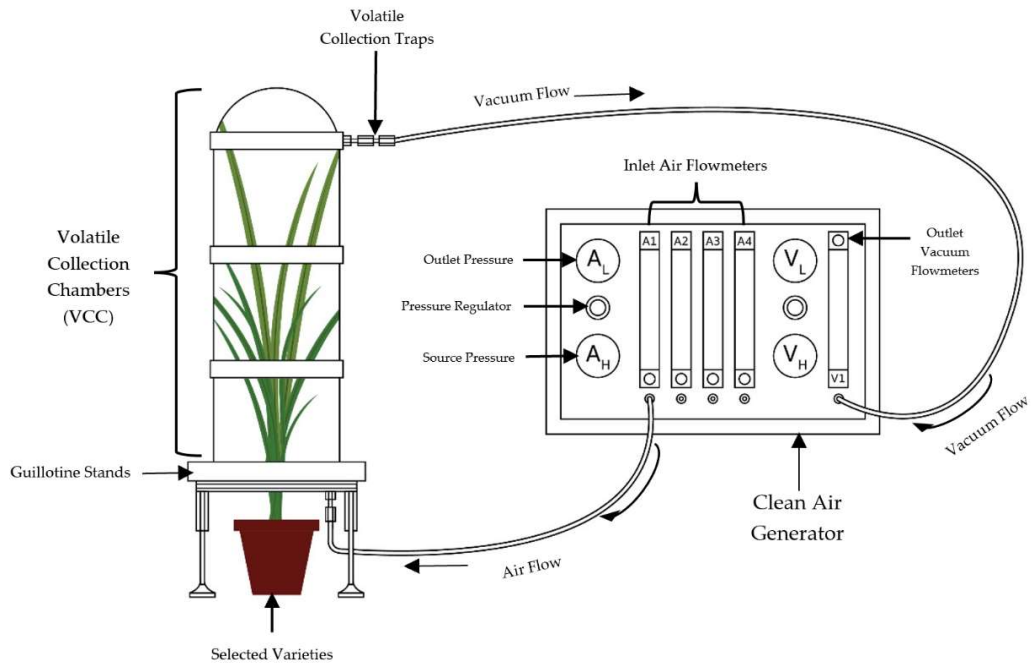

Supplementary Figure S1. Volatile collecting trap system using potted plants with and without BPH infestation.

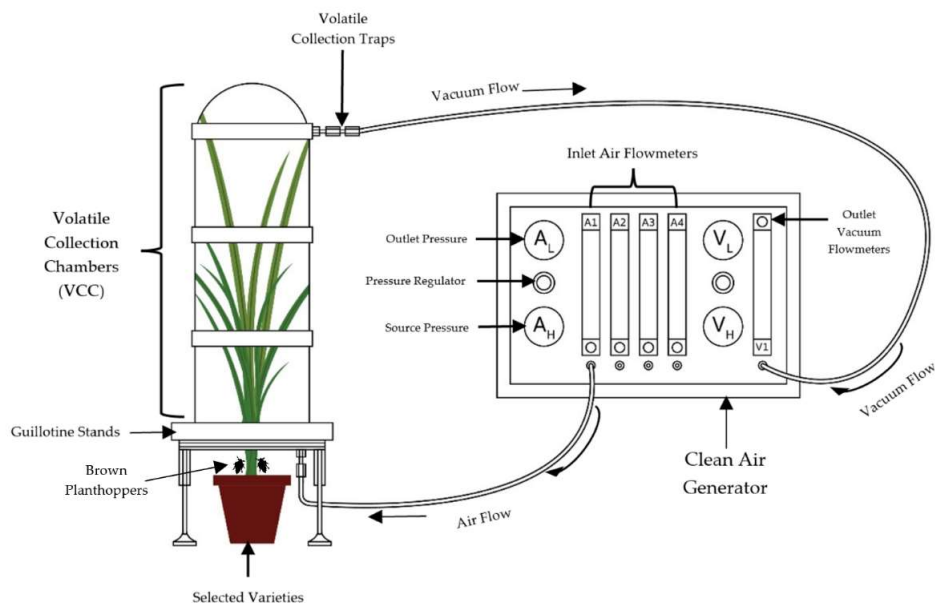

Supplementary Figure S2. Volatile collecting trap system using potted plants with BPH infestation.

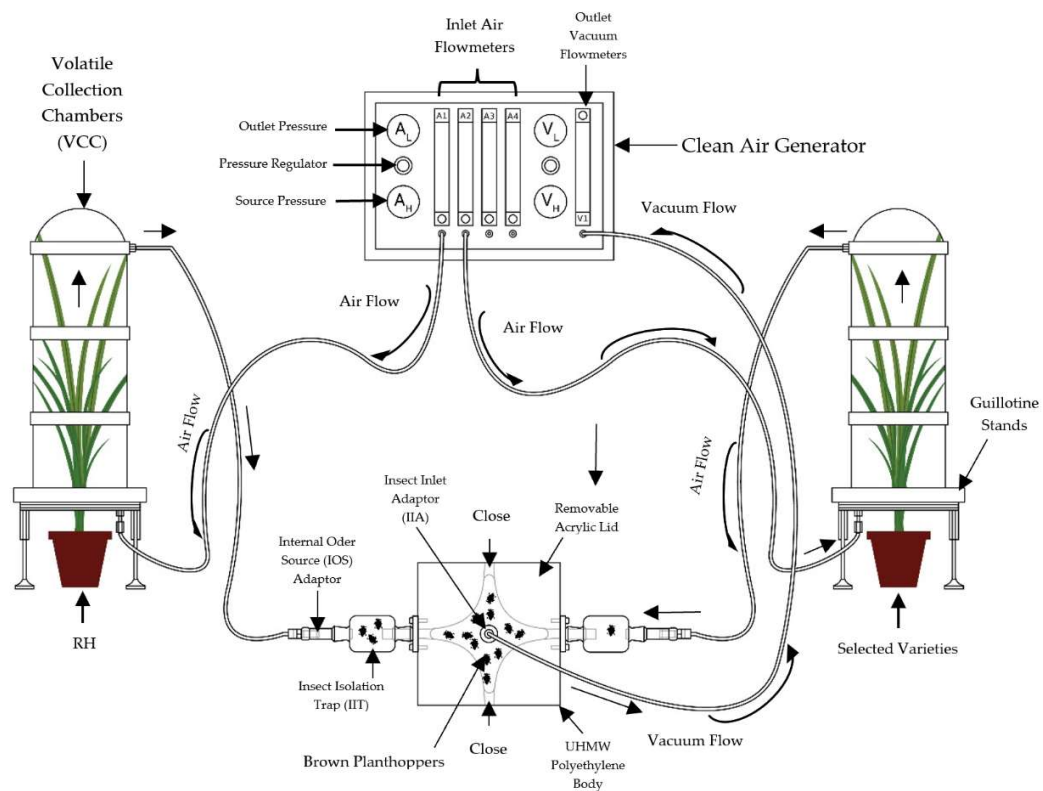

Supplementary Figure S3. Two-choice arena olfactometer system test using potted plants without BPH infestation.

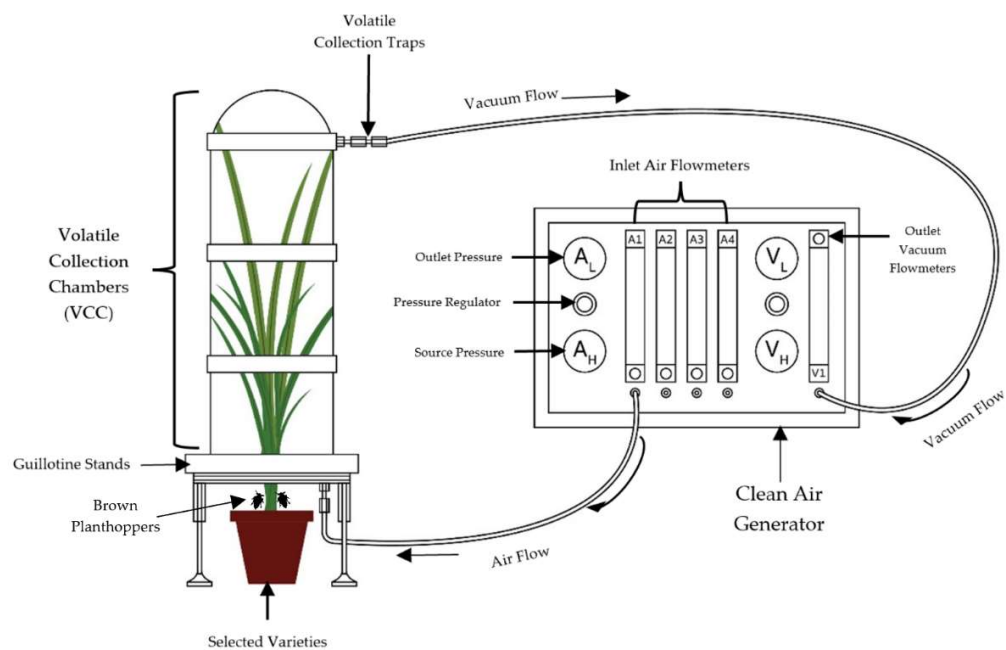

Supplementary Figure S4. Two-choice arena olfactometer system test using potted plants with BPH infestation.
